# Supplementary material
Source: PubMed Central journal article supplement (PMC3629795)
Supplement: supp_112.201046_JPET201046_sup_data.pdf [file supp_112.201046_JPET201046_sup_data.pdf]

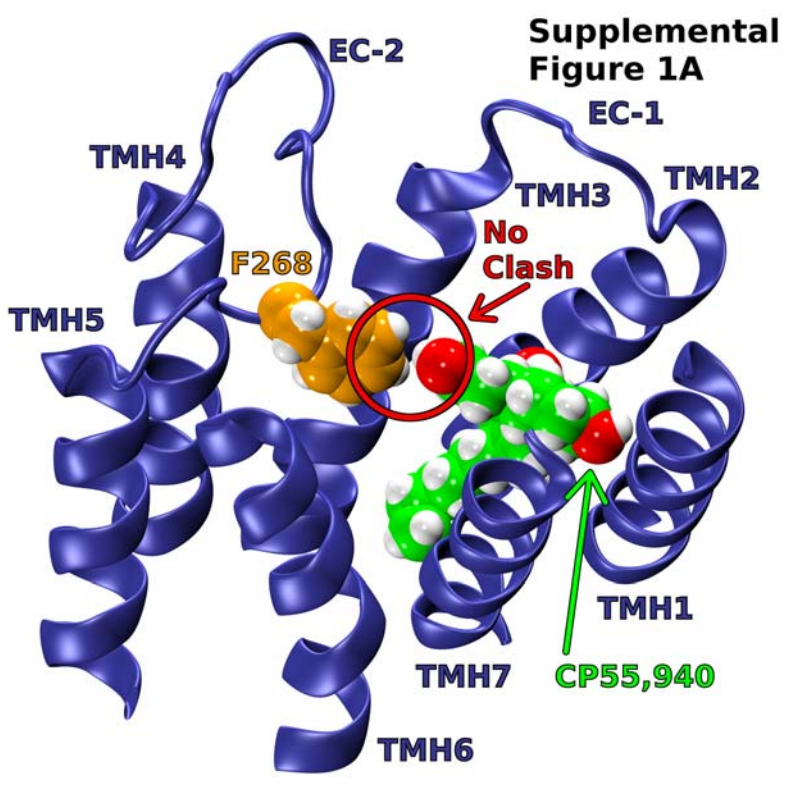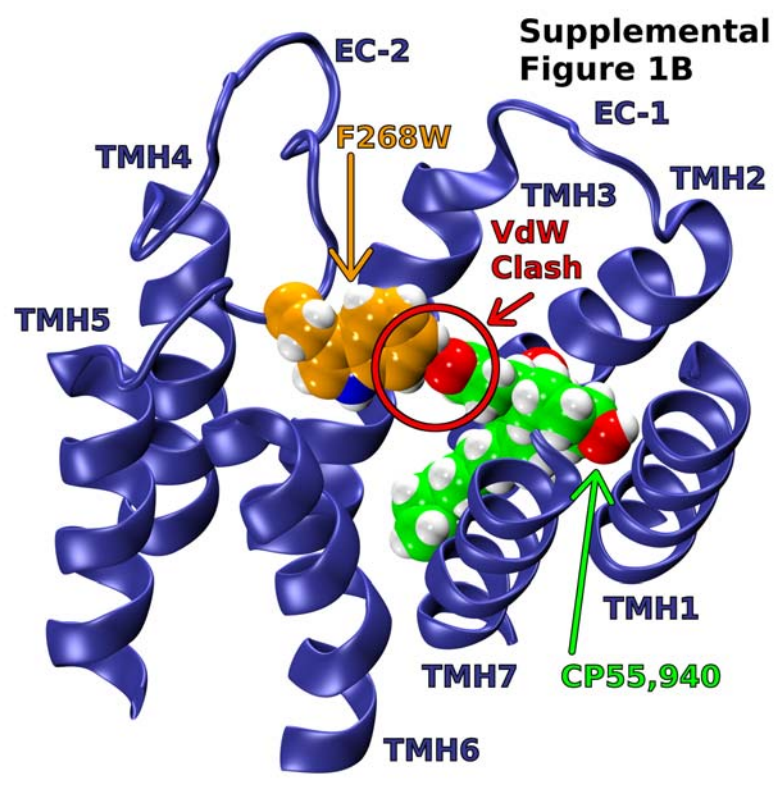

**Supplemental Figure 1.** EC-2 loop conformation of WT and F268W mutant CB1 receptors in the active (R\*) state. CP55,940 is shown in green; F268 and F268W are shown in orange. A) Red circle indicates that there is not a Van der Waals (VdW) clash between F268 and CP55,940. B) Red circle highlights VdW clash between F268W and CP55,940. This modeling was based on mutation studies from the Kendall lab (see Methods and reference 16).

Novel insights into CB1 Cannabinoid Receptor Signaling: A Key Interaction identified between EC-3 loop and TMH2. Jahan Marcu, Derek M. Shore, Ankur Kapur, Megan Trznadel, Alexandros Makriyannis, Patricia H. Reggio and Mary E. Abood, *Journal of Pharmacology and Experimental Therapeutics*

**Supplemental Table 1:** Pairwise interaction energies of CP55,940 at the CB<sub>1</sub> wild-type R\* model.

|                |                | kcal/mol:     |               |               |               |
|----------------|----------------|---------------|---------------|---------------|---------------|
| B/W #:         | Absolute #:    | Coulombic:    | VdW:          | Total:        | % total:      |
| <b>K3.28</b>   | <b>LYS-192</b> | -13.79        | 0.64          | -13.15        | <b>21.58</b>  |
| <b>Q1.32</b>   | <b>GLN-116</b> | -6.68         | -0.69         | -7.37         | <b>12.08</b>  |
| <b>L7.43</b>   | <b>LEU-387</b> | 0.12          | -4.48         | -4.36         | <b>7.15</b>   |
| <b>S7.39</b>   | <b>SER-383</b> | -1.46         | -2.50         | -3.96         | <b>6.50</b>   |
| <b>F2.57</b>   | <b>PHE-170</b> | 0.09          | -3.38         | -3.29         | <b>5.39</b>   |
| S1.39          | SER-123        | -1.18         | -1.70         | -2.88         | 4.73          |
| F2.64          | PHE-177        | 0.44          | -3.09         | -2.65         | 4.35          |
| V3.32          | VAL-196        | 0.03          | -2.63         | -2.60         | 4.27          |
| A7.36          | ALA-380        | -0.38         | -2.01         | -2.39         | 3.92          |
| I1.35          | ILE-119        | -0.53         | -1.80         | -2.33         | 3.83          |
| S2.60          | SER-173        | -0.38         | -1.66         | -2.04         | 3.35          |
| F3.25          | PHE-189        | -0.22         | -1.73         | -1.95         | 3.20          |
| I2.56          | ILE-169        | 0.11          | -1.64         | -1.52         | 2.50          |
| F3.36          | PHE-200        | 0.06          | -1.55         | -1.49         | 2.45          |
| EC-3           | ILE-375        | 0.05          | -1.34         | -1.29         | 2.12          |
| S7.46          | SER-390        | 0.10          | -1.07         | -0.97         | 1.59          |
| C7.42          | CYS-386        | 0.00          | -0.87         | -0.86         | 1.42          |
| M7.40          | MET-384        | -0.07         | -0.60         | -0.67         | 1.10          |
| S3.35          | SER-199        | -0.21         | -0.44         | -0.65         | 1.07          |
| N7.45          | ASN-389        | 0.12          | -0.75         | -0.63         | 1.03          |
| D2.50          | ASP-163        | -0.25         | -0.35         | -0.60         | 0.98          |
| F7.35          | PHE-379        | -0.08         | -0.50         | -0.58         | 0.96          |
| L1.33          | LEU-117        | -0.33         | -0.25         | -0.58         | 0.95          |
| EC-3           | MET-371        | -0.30         | -0.20         | -0.50         | 0.82          |
| A1.36          | ALA-120        | 1.56          | -1.98         | -0.42         | 0.69          |
| L1.40          | LEU-124        | -0.01         | -0.26         | -0.27         | 0.45          |
| L7.44          | LEU-388        | -0.01         | -0.17         | -0.18         | 0.30          |
| N/A            | WAT-344        | -0.04         | -0.14         | -0.18         | 0.29          |
| F2.67          | PHE-180        | 0.06          | -0.21         | -0.15         | 0.25          |
| G1.43          | GLY-127        | 0.03          | -0.18         | -0.15         | 0.25          |
| EC-2           | PHE-268        | 0.48          | -0.61         | -0.13         | 0.21          |
| EC-3           | LYS-373        | 0.41          | -0.49         | -0.09         | 0.14          |
| Q1.31          | GLN-115        | 0.07          | -0.14         | -0.08         | 0.13          |
| EC-2           | ILE-267        | 0.06          | -0.05         | 0.01          | -0.02         |
| <b>Totals:</b> |                | <b>-22.12</b> | <b>-38.84</b> | <b>-60.95</b> | <b>100.00</b> |

Novel insights into CB<sub>1</sub> Cannabinoid Receptor Signaling: A Key Interaction identified between EC-3 loop and TMH2. Jahan Marcu, Derek M. Shore, Ankur Kapur, Megan Trznadel, Alexandros Makriyannis, Patricia H. Reggio and Mary E. Abood, Journal of Pharmacology and Experimental Therapeutics

**Supplemental Table 2:** Pairwise interaction energies of CP55,940 at the CB<sub>1</sub> D2.63<sup>176</sup>A mutant R\* model.

| B/W #:         | Absolute #:    | kcal/mol:     |               |               |               |
|----------------|----------------|---------------|---------------|---------------|---------------|
|                |                | Coulomb:      | VdW:          | Total:        | % total:      |
| <b>K3.28</b>   | <b>LYS-192</b> | -14.28        | 1.09          | -13.19        | <b>21.88</b>  |
| <b>Q1.32</b>   | <b>GLN-116</b> | -6.34         | -0.72         | -7.07         | <b>11.72</b>  |
| <b>S7.39</b>   | <b>SER-383</b> | -1.55         | -3.02         | -4.56         | <b>7.57</b>   |
| <b>L7.43</b>   | <b>LEU-387</b> | 0.11          | -4.60         | -4.49         | <b>7.45</b>   |
| <b>F2.57</b>   | <b>PHE-170</b> | 0.09          | -3.43         | -3.34         | <b>5.54</b>   |
| F2.64          | PHE-177        | 0.23          | -3.23         | -2.99         | 4.97          |
| S1.39          | SER-123        | -1.19         | -1.60         | -2.79         | 4.62          |
| V3.32          | VAL-196        | 0.04          | -2.77         | -2.72         | 4.52          |
| I1.35          | ILE-119        | -0.55         | -1.92         | -2.47         | 4.10          |
| A7.36          | ALA-380        | -0.32         | -1.97         | -2.29         | 3.80          |
| S2.60          | SER-173        | -0.27         | -1.83         | -2.10         | 3.48          |
| I2.56          | ILE-169        | 0.11          | -1.63         | -1.52         | 2.52          |
| F3.36          | PHE-200        | 0.07          | -1.46         | -1.39         | 2.30          |
| S7.46          | SER-390        | 0.08          | -1.27         | -1.19         | 1.97          |
| C7.42          | CYS-386        | 0.00          | -0.97         | -0.97         | 1.61          |
| F7.35          | PHE-379        | -0.12         | -0.79         | -0.91         | 1.51          |
| EC-2           | PHE-268        | -0.21         | -0.51         | -0.72         | 1.20          |
| M7.40          | MET-384        | -0.08         | -0.62         | -0.70         | 1.15          |
| S3.35          | SER-199        | -0.22         | -0.47         | -0.69         | 1.15          |
| D2.50          | ASP-163        | -0.28         | -0.40         | -0.67         | 1.12          |
| N7.45          | ASN-389        | 0.12          | -0.79         | -0.67         | 1.11          |
| L1.33          | LEU-117        | -0.31         | -0.25         | -0.56         | 0.93          |
| A1.36          | ALA-120        | 1.55          | -2.07         | -0.52         | 0.86          |
| F3.25          | PHE-189        | -0.03         | -0.36         | -0.38         | 0.63          |
| EC-3           | MET-371        | -0.04         | -0.32         | -0.37         | 0.61          |
| L1.40          | LEU-124        | -0.01         | -0.27         | -0.28         | 0.47          |
| L7.44          | LEU-388        | -0.01         | -0.18         | -0.19         | 0.32          |
| N/A            | WAT-344        | -0.04         | -0.15         | -0.18         | 0.30          |
| G1.43          | GLY-127        | 0.03          | -0.19         | -0.16         | 0.26          |
| I6.54          | ILE-362        | -0.01         | -0.12         | -0.14         | 0.23          |
| Q1.31          | GLN-115        | 0.08          | -0.14         | -0.06         | 0.11          |
| <b>Totals:</b> |                | <b>-23.34</b> | <b>-36.94</b> | <b>-60.28</b> | <b>100.00</b> |

Novel insights into CB<sub>1</sub> Cannabinoid Receptor Signaling: A Key Interaction identified between EC-3 loop and TMH2. Jahan Marcu, Derek M. Shore, Ankur Kapur, Megan Trznadel, Alexandros Makriyannis, Patricia H. Reggio and Mary E. Abood, Journal of Pharmacology and Experimental Therapeutics

**Supplemental Table 3:** Pairwise interaction energies of CP55,940 at the CB<sub>1</sub> K373A mutant R\* model.

|                |                | kcal/mol:     |               |               |               |
|----------------|----------------|---------------|---------------|---------------|---------------|
| B/W #:         | Absolute #:    | Coulomb:      | VdW:          | Total:        | % total:      |
| <b>K3.28</b>   | <b>LYS-192</b> | -16.47        | -2.40         | -18.87        | <b>30.13</b>  |
| <b>Q1.32</b>   | <b>GLN-116</b> | -5.94         | -1.08         | -7.02         | <b>11.21</b>  |
| <b>S7.39</b>   | <b>SER-383</b> | -2.10         | -2.25         | -4.34         | <b>6.94</b>   |
| <b>L7.43</b>   | <b>LEU-387</b> | -0.41         | -3.36         | -3.77         | <b>6.02</b>   |
| <b>F2.57</b>   | <b>PHE-170</b> | 0.00          | -3.44         | -3.44         | <b>5.49</b>   |
| S1.39          | SER-123        | -0.99         | -1.66         | -2.66         | 4.24          |
| F2.64          | PHE-177        | -0.08         | -2.40         | -2.48         | 3.96          |
| S2.60          | SER-173        | -0.32         | -1.80         | -2.11         | 3.37          |
| C7.42          | CYS-386        | -0.04         | -1.90         | -1.94         | 3.10          |
| A1.36          | ALA-120        | 0.14          | -2.05         | -1.91         | 3.05          |
| F7.35          | PHE-379        | -0.48         | -1.39         | -1.87         | 2.98          |
| F3.36          | PHE-200        | -0.64         | -1.22         | -1.86         | 2.97          |
| V3.32          | VAL-196        | 0.11          | -1.80         | -1.68         | 2.69          |
| I2.56          | ILE-169        | 0.17          | -1.65         | -1.48         | 2.36          |
| S7.46          | SER-390        | -0.27         | -0.79         | -1.06         | 1.70          |
| I1.35          | ILE-119        | 0.97          | -1.86         | -0.89         | 1.42          |
| A7.36          | ALA-380        | 0.36          | -1.16         | -0.81         | 1.29          |
| L1.33          | LEU-117        | -0.49         | -0.23         | -0.72         | 1.15          |
| EC-2           | PHE-268        | -0.40         | -0.31         | -0.71         | 1.14          |
| D2.50          | ASP-163        | -0.29         | -0.39         | -0.68         | 1.08          |
| F3.25          | PHE-189        | 0.25          | -0.92         | -0.67         | 1.07          |
| N7.45          | ASN-389        | 0.13          | -0.72         | -0.59         | 0.94          |
| L1.40          | LEU-124        | 0.02          | -0.27         | -0.25         | 0.40          |
| M7.40          | MET-384        | 0.07          | -0.31         | -0.23         | 0.38          |
| G1.43          | GLY-127        | 0.00          | -0.18         | -0.19         | 0.30          |
| S3.35          | SER-199        | 0.45          | -0.59         | -0.14         | 0.22          |
| I6.54          | ILE-362        | -0.08         | -0.04         | -0.12         | 0.19          |
| L7.44          | LEU-388        | 0.45          | -0.56         | -0.11         | 0.18          |
| Q1.31          | GLN-115        | 0.11          | -0.14         | -0.03         | 0.04          |
| EC-3           | MET-371        | 0.00          | 0.00          | 0.00          | 0.00          |
| N/A            | WAT-344        | 0.00          | 0.00          | 0.00          | 0.00          |
| <b>Totals:</b> |                | <b>-25.74</b> | <b>-36.87</b> | <b>-62.62</b> | <b>100.00</b> |

Novel insights into CB<sub>1</sub> Cannabinoid Receptor Signaling: A Key Interaction identified between EC-3 loop and TMH2. Jahan Marcu, Derek M. Shore, Ankur Kapur, Megan Trznadel, Alexandros Makriyannis, Patricia H. Reggio and Mary E. Abood, Journal of Pharmacology and Experimental Therapeutics

**Supplemental Table 4:** Pairwise interaction energies of CP55,940 at the CB<sub>1</sub> D2.63<sup>176</sup>A-K373A mutant R\* model.

| kcal/mol:      |                |               |               |               |               |
|----------------|----------------|---------------|---------------|---------------|---------------|
| B/W #:         | Absolute #:    | Coulomb:      | VdW:          | Total:        | % total:      |
| <b>K3.28</b>   | <b>LYS-192</b> | -14.07        | 0.88          | -13.18        | <b>21.19</b>  |
| <b>Q1.32</b>   | <b>GLN-116</b> | -6.37         | -0.94         | -7.31         | <b>11.75</b>  |
| <b>L7.43</b>   | <b>LEU-387</b> | 0.12          | -4.60         | -4.48         | <b>7.21</b>   |
| <b>S7.39</b>   | <b>SER-383</b> | -1.51         | -2.92         | -4.43         | <b>7.13</b>   |
| <b>F2.57</b>   | <b>PHE-170</b> | 0.09          | -3.43         | -3.34         | <b>5.38</b>   |
| F2.64          | PHE-177        | 0.40          | -3.22         | -2.82         | 4.54          |
| S1.39          | SER-123        | -1.15         | -1.61         | -2.76         | 4.43          |
| V3.32          | VAL-196        | 0.05          | -2.75         | -2.71         | 4.35          |
| I1.35          | ILE-119        | -0.49         | -1.91         | -2.39         | 3.85          |
| A7.36          | ALA-380        | -0.38         | -2.00         | -2.38         | 3.82          |
| S2.60          | SER-173        | -0.30         | -1.82         | -2.12         | 3.41          |
| EC-1           | HID-181        | -0.79         | -1.06         | -1.85         | 2.97          |
| I2.56          | ILE-169        | 0.11          | -1.63         | -1.52         | 2.45          |
| F3.36          | PHE-200        | 0.07          | -1.45         | -1.38         | 2.22          |
| S7.46          | SER-390        | 0.08          | -1.26         | -1.17         | 1.88          |
| C7.42          | CYS-386        | 0.00          | -0.98         | -0.97         | 1.56          |
| F3.25          | PHE-189        | 0.16          | -1.03         | -0.87         | 1.40          |
| F7.35          | PHE-379        | -0.11         | -0.67         | -0.78         | 1.26          |
| EC-2           | PHE-268        | -0.25         | -0.48         | -0.74         | 1.18          |
| S3.35          | SER-199        | -0.22         | -0.50         | -0.72         | 1.15          |
| M7.40          | MET-384        | -0.08         | -0.61         | -0.68         | 1.10          |
| D2.50          | ASP-163        | -0.28         | -0.39         | -0.68         | 1.09          |
| N7.45          | ASN-389        | 0.12          | -0.78         | -0.65         | 1.05          |
| A1.36          | ALA-120        | 1.46          | -2.09         | -0.63         | 1.01          |
| L1.33          | LEU-117        | -0.31         | -0.24         | -0.56         | 0.90          |
| L1.40          | LEU-124        | -0.01         | -0.27         | -0.28         | 0.45          |
| L7.44          | LEU-388        | -0.01         | -0.18         | -0.19         | 0.30          |
| N/A            | WAT-344        | -0.04         | -0.14         | -0.18         | 0.29          |
| K7.32          | LYS-376        | 0.06          | -0.23         | -0.17         | 0.27          |
| G1.43          | GLY-127        | 0.04          | -0.19         | -0.15         | 0.25          |
| I6.54          | ILE-362        | -0.01         | -0.09         | -0.10         | 0.16          |
| Q1.31          | GLN-115        | 0.07          | -0.14         | -0.07         | 0.11          |
| <b>Totals:</b> |                | <b>-23.61</b> | <b>-38.60</b> | <b>-62.22</b> | <b>100.00</b> |

Novel insights into CB<sub>1</sub> Cannabinoid Receptor Signaling: A Key Interaction identified between EC-3 loop and TMH2. Jahan Marcu, Derek M. Shore, Ankur Kapur, Megan Trznadel,

Alexandros Makriyannis, Patricia H. Reggio and Mary E. Abood, *Journal of Pharmacology and Experimental Therapeutics*

**Supplemental Table 5: Pairwise interaction energies of CP55,940 at the CB<sub>1</sub> D2.63<sup>176</sup>K-K373D mutant R\* model.**

|              |                | kcal/mol: |       |        |              |
|--------------|----------------|-----------|-------|--------|--------------|
| B/W #:       | Absolute #:    | Coulomb:  | VdW:  | Total: | % total:     |
| <b>K3.28</b> | <b>LYS-192</b> | -14.58    | 1.33  | -13.26 | <b>20.89</b> |
| <b>Q1.32</b> | <b>GLN-116</b> | -7.09     | -0.22 | -7.31  | <b>11.51</b> |
| <b>S7.39</b> | <b>SER-383</b> | -1.60     | -2.97 | -4.57  | <b>7.20</b>  |
| <b>L7.43</b> | <b>LEU-387</b> | 0.11      | -4.61 | -4.50  | <b>7.09</b>  |
| <b>F2.57</b> | <b>PHE-170</b> | 0.10      | -3.38 | -3.29  | <b>5.18</b>  |
| F2.64        | PHE-177        | 0.14      | -3.30 | -3.16  | 4.97         |
| S1.39        | SER-123        | -1.17     | -1.69 | -2.87  | 4.51         |
| V3.32        | VAL-196        | 0.03      | -2.78 | -2.75  | 4.33         |
| I1.35        | ILE-119        | -0.65     | -1.92 | -2.57  | 4.05         |
| A7.36        | ALA-380        | -0.21     | -2.03 | -2.24  | 3.52         |
| S2.60        | SER-173        | -0.23     | -1.83 | -2.05  | 3.24         |
| I2.56        | ILE-169        | 0.11      | -1.61 | -1.50  | 2.36         |
| EC-3         | ASP-373        | -1.09     | -0.41 | -1.50  | 2.36         |
| F3.36        | PHE-200        | 0.07      | -1.46 | -1.39  | 2.19         |
| S7.46        | SER-390        | 0.08      | -1.27 | -1.19  | 1.87         |
| EC-3         | ILE-375        | -0.03     | -1.14 | -1.17  | 1.84         |
| F7.35        | PHE-379        | -0.14     | -1.00 | -1.14  | 1.80         |
| C7.42        | CYS-386        | -0.03     | -0.97 | -0.99  | 1.57         |
| EC-3         | MET-371        | -0.38     | -0.59 | -0.97  | 1.52         |
| S3.35        | SER-199        | -0.22     | -0.48 | -0.71  | 1.11         |
| M7.40        | MET-384        | -0.07     | -0.62 | -0.69  | 1.09         |
| N7.45        | ASN-389        | 0.11      | -0.79 | -0.68  | 1.07         |
| D2.50        | ASP-163        | -0.26     | -0.40 | -0.65  | 1.03         |
| L1.33        | LEU-117        | -0.32     | -0.26 | -0.58  | 0.92         |
| F3.25        | PHE-189        | 0.10      | -0.66 | -0.56  | 0.88         |
| A1.36        | ALA-120        | 1.66      | -1.98 | -0.32  | 0.51         |
| L1.40        | LEU-124        | -0.02     | -0.26 | -0.28  | 0.44         |
| I6.54        | ILE-362        | -0.03     | -0.17 | -0.20  | 0.32         |
| L7.44        | LEU-388        | -0.01     | -0.18 | -0.19  | 0.30         |
| N/A          | WAT-344        | -0.04     | -0.15 | -0.18  | 0.29         |
| F2.67        | PHE-180        | 0.07      | -0.25 | -0.18  | 0.29         |
| G1.43        | GLY-127        | 0.03      | -0.18 | -0.15  | 0.24         |
| EC-2         | PHE-268        | 0.16      | -0.26 | -0.10  | 0.16         |
| Q1.31        | GLN-115        | 0.09      | -0.14 | -0.06  | 0.09         |
| K2.63        | LYS-176        | 0.59      | -0.12 | 0.47   | <b>-0.75</b> |

|                |               |               |               |               |
|----------------|---------------|---------------|---------------|---------------|
| <b>Totals:</b> | <b>-24.72</b> | <b>-38.74</b> | <b>-63.46</b> | <b>100.00</b> |
|----------------|---------------|---------------|---------------|---------------|
